# Supplementary material for: KIF2C Is a Novel Prognostic Biomarker and Correlated with Immune Infiltration in Endometrial Cancer
Source: PubMed Central journal article supplement (PMC8510809; doi:10.1155/2021/1434856), 2021-10-05
Supplement: 1434856.f1.pdf [file 1434856.f1.pdf]

Figure S1 Correlation of KIF2C expression with patients' clinicoopathological features in primary endometrial cancer

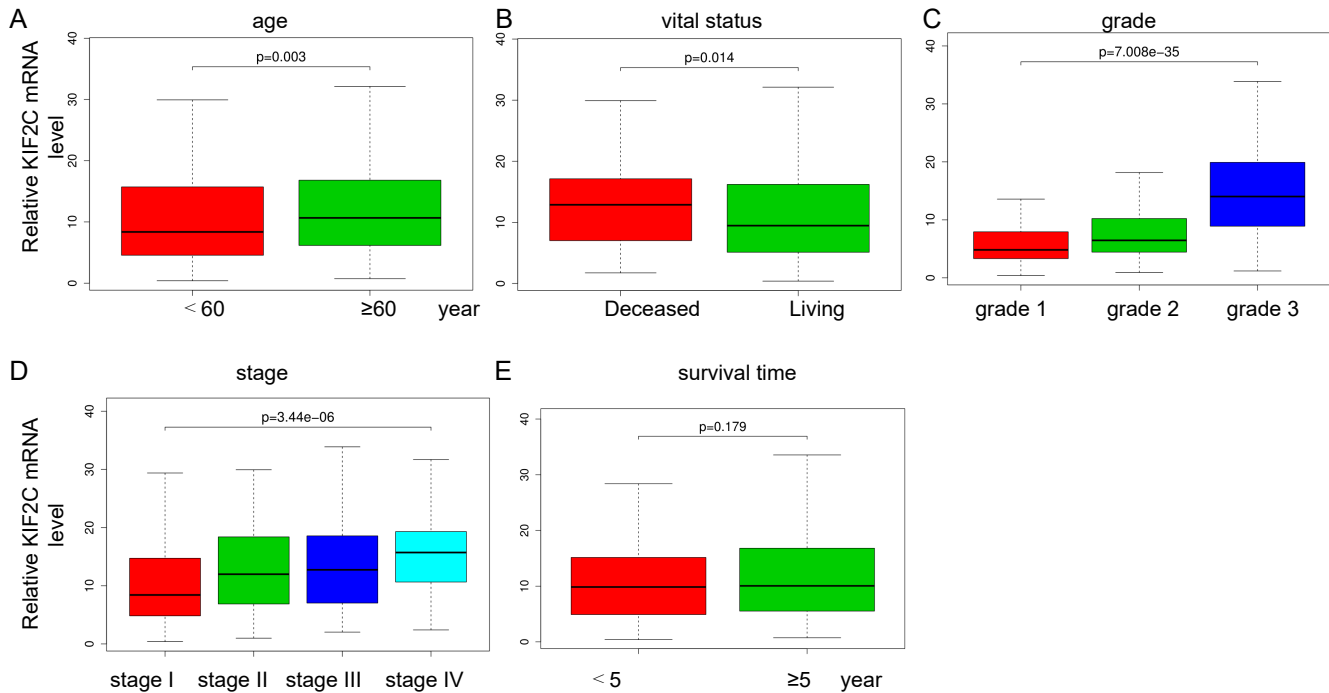

(A-E) The association between KIF2C expression and clinical characteristics of endometrial cancer patients in TCGA.
